# Supplementary material for: PDIA2 Bridges Endoplasmic Reticulum Stress and Metabolic Reprogramming During Malignant Transformation of Chronic Colitis
Source: Front Oncol. 2022 Jul 4;12:836087. doi: 10.3389/fonc.2022.836087 (PMC9289542; doi:10.3389/fonc.2022.836087)
Supplement: Supplementary file 16 [file Table_9.xlsx]

## Sheet: Glucose
Sample Name	Sample Type	File Name	Analyte Peak Area (counts)	Analyte Peak Height (cps)	Analyte Retention Time (min)	IS Peak Area (counts)	IS Peak Height (cps)	IS Retention Time (min)	Analyte/IS	weight	Analyte/IS/weight
NaCl-1	Unknown	Data20220124-TCA-Glycolysis-14W.wiff	105000	26000	1.13	62800	10500	1.13	1.67197	12.4	0.134837
NaCl-2	Unknown	Data20220124-TCA-Glycolysis-14W.wiff	90300	22900	1.12	61200	10600	1.13	1.47549	11.09	0.133047
NaCl-3	Unknown	Data20220124-TCA-Glycolysis-14W.wiff	4660	2050	1.13	57100	10500	1.13	0.0816112	8.72	0.00935908
NaCl-4	Unknown	Data20220124-TCA-Glycolysis-14W.wiff	193000	38300	1.14	88200	14500	1.14	2.18821	10.58	0.206825
NaCl-5	Unknown	Data20220124-TCA-Glycolysis-14W.wiff	121000	29100	1.13	83000	12900	1.13	1.45783	12.4	0.117567
NaCl-6	Unknown	Data20220124-TCA-Glycolysis-14W.wiff	97000	23100	1.13	77300	14200	1.13	1.25485	11.09	0.113152
NaCl-7	Unknown	Data20220124-TCA-Glycolysis-14W.wiff	4140	1840	1.13	44900	8630	1.13	0.0922049	8.72	0.010574
NaCl-8	Unknown	Data20220124-TCA-Glycolysis-14W.wiff	164000	36300	1.14	77500	13500	1.14	2.11613	10.58	0.200012
AOM-1	Unknown	Data20220124-TCA-Glycolysis-14W.wiff	362000	65600	1.13	67000	16400	1.13	5.40299	9.19	0.58792
AOM-2	Unknown	Data20220124-TCA-Glycolysis-14W.wiff	435000	72900	1.13	162000	21900	1.13	2.68519	18.77	0.143057
AOM-3	Unknown	Data20220124-TCA-Glycolysis-14W.wiff	164000	33700	1.13	135000	20800	1.13	1.21481	10.89	0.111553
AOM-4	Unknown	Data20220124-TCA-Glycolysis-14W.wiff	318000	59200	1.14	148000	23300	1.13	2.14865	6.57	0.327039
AOM-5	Unknown	Data20220124-TCA-Glycolysis-14W.wiff	365000	68400	1.13	153000	21500	1.13	2.38562	9.19	0.259589
AOM-6	Unknown	Data20220124-TCA-Glycolysis-14W.wiff	475000	96300	1.14	179000	26100	1.14	2.65363	18.77	0.141376
AOM-7	Unknown	Data20220124-TCA-Glycolysis-14W.wiff	147000	34000	1.14	120000	18800	1.14	1.225	10.89	0.112489
AOM-8	Unknown	Data20220124-TCA-Glycolysis-14W.wiff	355000	81500	1.14	160000	26800	1.14	2.21875	6.57	0.337709
AOM/4PBA-1	Unknown	Data20220124-TCA-Glycolysis-14W.wiff	113000	24300	1.16	119000	18200	1.15	0.94958	11.5	0.0825722
AOM/4PBA-2	Unknown	Data20220124-TCA-Glycolysis-14W.wiff	351000	59700	1.16	147000	20700	1.15	2.38776	20.4	0.117047
AOM/4PBA-3	Unknown	Data20220124-TCA-Glycolysis-14W.wiff	89500	19600	1.13	124000	18100	1.13	0.721774	9.4	0.0767845
AOM/4PBA-4	Unknown	Data20220124-TCA-Glycolysis-14W.wiff	116000	16600	1.16	124000	18600	1.15	0.935484	11.5	0.0813464
AOM/4PBA-5	Unknown	Data20220124-TCA-Glycolysis-14W.wiff	383000	57300	1.16	140000	20000	1.15	2.73571	20.4	0.134104
AOM/4PBA-6	Unknown	Data20220124-TCA-Glycolysis-14W.wiff	96600	23800	1.14	139000	22500	1.14	0.694964	9.4	0.0739323
AOM/4PBA-7	Unknown	Data20220124-TCA-Glycolysis-14W.wiff	124000	22400	1.16	126000	19700	1.15	0.984127	11.5	0.0855763
AOM/4PBA-8	Unknown	Data20220124-TCA-Glycolysis-14W.wiff	364000	53300	1.16	138000	20400	1.15	2.63768	20.4	0.129298

## Sheet: Glucose-6-phosphorate
Sample Name	Sample Type	File Name	Analyte Peak Area (counts)	Analyte Peak Height (cps)	Analyte Retention Time (min)	IS Peak Area (counts)	IS Peak Height (cps)	IS Retention Time (min)	Analyte/IS	weight	Analyte/IS/weight
NaCl-1	Unknown	Data20220124-TCA-Glycolysis-14W.wiff	1310000	255000	1.21	62800	10500	1.13	20.8599	12.4	1.68225
NaCl-2	Unknown	Data20220124-TCA-Glycolysis-14W.wiff	1020000	224000	1.21	61200	10600	1.13	16.6667	11.09	1.50286
NaCl-3	Unknown	Data20220124-TCA-Glycolysis-14W.wiff	61100	27500	1.21	57100	10500	1.13	1.07005	8.72	0.122712
NaCl-4	Unknown	Data20220124-TCA-Glycolysis-14W.wiff	1240000	272000	1.22	88200	14500	1.14	14.059	10.58	1.32882
NaCl-5	Unknown	Data20220124-TCA-Glycolysis-14W.wiff	1340000	273000	1.22	83000	12900	1.13	16.1446	12.4	1.30198
NaCl-6	Unknown	Data20220124-TCA-Glycolysis-14W.wiff	1080000	226000	1.22	77300	14200	1.13	13.9715	11.09	1.25983
NaCl-7	Unknown	Data20220124-TCA-Glycolysis-14W.wiff	76300	32900	1.22	44900	8630	1.13	1.69933	8.72	0.194878
NaCl-8	Unknown	Data20220124-TCA-Glycolysis-14W.wiff	1460000	278000	1.22	77500	13500	1.14	18.8387	10.58	1.7806
AOM-1	Unknown	Data20220124-TCA-Glycolysis-14W.wiff	2310000	417000	1.2	67000	16400	1.13	34.4776	9.19	3.75164
AOM-2	Unknown	Data20220124-TCA-Glycolysis-14W.wiff	4630000	974000	1.21	162000	21900	1.13	28.5802	18.77	1.52266
AOM-3	Unknown	Data20220124-TCA-Glycolysis-14W.wiff	1650000	297000	1.21	135000	20800	1.13	12.2222	10.89	1.12233
AOM-4	Unknown	Data20220124-TCA-Glycolysis-14W.wiff	1950000	423000	1.21	148000	23300	1.13	13.1757	6.57	2.00543
AOM-5	Unknown	Data20220124-TCA-Glycolysis-14W.wiff	2370000	429000	1.2	153000	21500	1.13	15.4902	9.19	1.68555
AOM-6	Unknown	Data20220124-TCA-Glycolysis-14W.wiff	4450000	835000	1.21	179000	26100	1.14	24.8603	18.77	1.32447
AOM-7	Unknown	Data20220124-TCA-Glycolysis-14W.wiff	2490000	460000	1.22	120000	18800	1.14	20.75	10.89	1.90542
AOM-8	Unknown	Data20220124-TCA-Glycolysis-14W.wiff	2190000	404000	1.21	160000	26800	1.14	13.6875	6.57	2.08333
AOM/4PBA-1	Unknown	Data20220124-TCA-Glycolysis-14W.wiff	1600000	355000	1.2	119000	18200	1.15	13.4454	11.5	1.16916
AOM/4PBA-2	Unknown	Data20220124-TCA-Glycolysis-14W.wiff	1760000	779000	1.15	147000	20700	1.15	11.9728	20.4	0.586901
AOM/4PBA-3	Unknown	Data20220124-TCA-Glycolysis-14W.wiff	1740000	342000	1.21	124000	18100	1.13	14.0323	9.4	1.49279
AOM/4PBA-4	Unknown	Data20220124-TCA-Glycolysis-14W.wiff	2120000	430000	1.21	124000	18600	1.15	17.0968	11.5	1.48668
AOM/4PBA-5	Unknown	Data20220124-TCA-Glycolysis-14W.wiff	5240000	996000	1.2	140000	20000	1.15	37.4286	20.4	1.83473
AOM/4PBA-6	Unknown	Data20220124-TCA-Glycolysis-14W.wiff	1700000	312000	1.21	139000	22500	1.14	12.2302	9.4	1.30109
AOM/4PBA-7	Unknown	Data20220124-TCA-Glycolysis-14W.wiff	2210000	448000	1.2	126000	19700	1.15	17.5397	11.5	1.52519
AOM/4PBA-8	Unknown	Data20220124-TCA-Glycolysis-14W.wiff	4290000	873000	1.2	138000	20400	1.15	31.087	20.4	1.52387

## Sheet: fructose-6-phosphorate
Sample Name	Sample Type	File Name	Analyte Peak Area (counts)	Analyte Peak Height (cps)	Analyte Retention Time (min)	IS Peak Area (counts)	IS Peak Height (cps)	IS Retention Time (min)	Analyte/IS	weight	Analyte/IS/weight
NaCl-1	Unknown	Data20220124-TCA-Glycolysis-14W.wiff	1300000	280000	1.21	62800	10500	1.13	20.7006	12.4	1.66941
NaCl-2	Unknown	Data20220124-TCA-Glycolysis-14W.wiff	289000	145000	1.21	61200	10600	1.13	4.72222	11.09	0.425809
NaCl-3	Unknown	Data20220124-TCA-Glycolysis-14W.wiff	81300	29300	1.21	57100	10500	1.13	1.42382	8.72	0.163282
NaCl-4	Unknown	Data20220124-TCA-Glycolysis-14W.wiff	1220000	268000	1.22	88200	14500	1.14	13.8322	10.58	1.30739
NaCl-5	Unknown	Data20220124-TCA-Glycolysis-14W.wiff	1390000	288000	1.22	83000	12900	1.13	16.747	12.4	1.35056
NaCl-6	Unknown	Data20220124-TCA-Glycolysis-14W.wiff	1060000	219000	1.22	77300	14200	1.13	13.7128	11.09	1.2365
NaCl-7	Unknown	Data20220124-TCA-Glycolysis-14W.wiff	206000	44100	1.22	44900	8630	1.13	4.58797	8.72	0.526144
NaCl-8	Unknown	Data20220124-TCA-Glycolysis-14W.wiff	1300000	270000	1.22	77500	13500	1.14	16.7742	10.58	1.58546
AOM-1	Unknown	Data20220124-TCA-Glycolysis-14W.wiff	641000	235000	1.2	67000	16400	1.13	9.56716	9.19	1.04104
AOM-2	Unknown	Data20220124-TCA-Glycolysis-14W.wiff	4680000	1040000	1.2	162000	21900	1.13	28.8889	18.77	1.5391
AOM-3	Unknown	Data20220124-TCA-Glycolysis-14W.wiff	1670000	308000	1.21	135000	20800	1.13	12.3704	10.89	1.13594
AOM-4	Unknown	Data20220124-TCA-Glycolysis-14W.wiff	1990000	398000	1.21	148000	23300	1.13	13.4459	6.57	2.04657
AOM-5	Unknown	Data20220124-TCA-Glycolysis-14W.wiff	2310000	415000	1.2	153000	21500	1.13	15.098	9.19	1.64288
AOM-6	Unknown	Data20220124-TCA-Glycolysis-14W.wiff	4260000	826000	1.21	179000	26100	1.14	23.7989	18.77	1.26792
AOM-7	Unknown	Data20220124-TCA-Glycolysis-14W.wiff	2700000	482000	1.22	120000	18800	1.14	22.5	10.89	2.06612
AOM-8	Unknown	Data20220124-TCA-Glycolysis-14W.wiff	2050000	401000	1.21	160000	26800	1.14	12.8125	6.57	1.95015
AOM/4PBA-1	Unknown	Data20220124-TCA-Glycolysis-14W.wiff	2040000	374000	1.2	119000	18200	1.15	17.1429	11.5	1.49068
AOM/4PBA-2	Unknown	Data20220124-TCA-Glycolysis-14W.wiff	4440000	849000	1.2	147000	20700	1.15	30.2041	20.4	1.48059
AOM/4PBA-3	Unknown	Data20220124-TCA-Glycolysis-14W.wiff	1780000	349000	1.21	124000	18100	1.13	14.3548	9.4	1.52711
AOM/4PBA-4	Unknown	Data20220124-TCA-Glycolysis-14W.wiff	2020000	383000	1.2	124000	18600	1.15	16.2903	11.5	1.41655
AOM/4PBA-5	Unknown	Data20220124-TCA-Glycolysis-14W.wiff	4480000	955000	1.2	140000	20000	1.15	32	20.4	1.56863
AOM/4PBA-6	Unknown	Data20220124-TCA-Glycolysis-14W.wiff	1730000	315000	1.21	139000	22500	1.14	12.446	9.4	1.32405
AOM/4PBA-7	Unknown	Data20220124-TCA-Glycolysis-14W.wiff	2280000	466000	1.2	126000	19700	1.15	18.0952	11.5	1.5735
AOM/4PBA-8	Unknown	Data20220124-TCA-Glycolysis-14W.wiff	5340000	988000	1.21	138000	20400	1.15	38.6957	20.4	1.89685

## Sheet: 1,3-diphosphoglycerate
Sample Name	Sample Type	File Name	Analyte Peak Area (counts)	Analyte Peak Height (cps)	Analyte Retention Time (min)	IS Peak Area (counts)	IS Peak Height (cps)	IS Retention Time (min)	Analyte/IS	weight	Analyte/IS/weight
NaCl-1	Unknown	Data20220124-TCA-Glycolysis-14W.wiff	507	472	1.21	62800	10500	1.13	0.00807325	12.4	0.000651068
NaCl-2	Unknown	Data20220124-TCA-Glycolysis-14W.wiff	2350	996	1.22	61200	10600	1.13	0.0383987	11.09	0.00346246
NaCl-3	Unknown	Data20220124-TCA-Glycolysis-14W.wiff	746	362	1.26	57100	10500	1.13	0.0130648	8.72	0.00149826
NaCl-4	Unknown	Data20220124-TCA-Glycolysis-14W.wiff	5410	1120	1.23	88200	14500	1.14	0.0613379	10.58	0.00579753
NaCl-5	Unknown	Data20220124-TCA-Glycolysis-14W.wiff	727	555	1.22	83000	12900	1.13	0.00875904	12.4	0.000706374
NaCl-6	Unknown	Data20220124-TCA-Glycolysis-14W.wiff	3440	1010	1.24	77300	14200	1.13	0.0445019	11.09	0.0040128
NaCl-7	Unknown	Data20220124-TCA-Glycolysis-14W.wiff	1680	714	1.38	44900	8630	1.13	0.0374165	8.72	0.00429088
NaCl-8	Unknown	Data20220124-TCA-Glycolysis-14W.wiff	344	337	1.23	77500	13500	1.14	0.00443871	10.58	0.000419538
AOM-1	Unknown	Data20220124-TCA-Glycolysis-14W.wiff	31900	7530	1.22	67000	16400	1.13	0.476119	9.19	0.0518084
AOM-2	Unknown	Data20220124-TCA-Glycolysis-14W.wiff	5090	3490	1.21	162000	21900	1.13	0.0314198	18.77	0.00167393
AOM-3	Unknown	Data20220124-TCA-Glycolysis-14W.wiff	37100	8130	1.23	135000	20800	1.13	0.274815	10.89	0.0252355
AOM-4	Unknown	Data20220124-TCA-Glycolysis-14W.wiff	2620	1580	1.22	148000	23300	1.13	0.0177027	6.57	0.00269448
AOM-5	Unknown	Data20220124-TCA-Glycolysis-14W.wiff	32400	6860	1.22	153000	21500	1.13	0.211765	9.19	0.0230429
AOM-6	Unknown	Data20220124-TCA-Glycolysis-14W.wiff	31400	7610	1.23	179000	26100	1.14	0.175419	18.77	0.00934571
AOM-7	Unknown	Data20220124-TCA-Glycolysis-14W.wiff	35000	9000	1.26	120000	18800	1.14	0.291667	10.89	0.026783
AOM-8	Unknown	Data20220124-TCA-Glycolysis-14W.wiff	9490	2410	1.23	160000	26800	1.14	0.0593125	6.57	0.00902778
AOM/4PBA-1	Unknown	Data20220124-TCA-Glycolysis-14W.wiff	74800	16700	1.26	119000	18200	1.15	0.628571	11.5	0.0546584
AOM/4PBA-2	Unknown	Data20220124-TCA-Glycolysis-14W.wiff	177000	40500	1.26	147000	20700	1.15	1.20408	20.4	0.0590236
AOM/4PBA-3	Unknown	Data20220124-TCA-Glycolysis-14W.wiff	22800	4170	1.22	124000	18100	1.13	0.183871	9.4	0.0195607
AOM/4PBA-4	Unknown	Data20220124-TCA-Glycolysis-14W.wiff	72400	16900	1.27	124000	18600	1.15	0.583871	11.5	0.0507714
AOM/4PBA-5	Unknown	Data20220124-TCA-Glycolysis-14W.wiff	211000	51900	1.25	140000	20000	1.15	1.50714	20.4	0.0738796
AOM/4PBA-6	Unknown	Data20220124-TCA-Glycolysis-14W.wiff	20100	4390	1.25	139000	22500	1.14	0.144604	9.4	0.0153834
AOM/4PBA-7	Unknown	Data20220124-TCA-Glycolysis-14W.wiff	85000	18800	1.26	126000	19700	1.15	0.674603	11.5	0.0586611
AOM/4PBA-8	Unknown	Data20220124-TCA-Glycolysis-14W.wiff	189000	45900	1.26	138000	20400	1.15	1.36957	20.4	0.0671355

## Sheet: Phosphoenolpyruvate
Sample Name	Sample Type	File Name	Analyte Peak Area (counts)	Analyte Peak Height (cps)	Analyte Retention Time (min)	IS Peak Area (counts)	IS Peak Height (cps)	IS Retention Time (min)	Analyte/IS	weight	Analyte/IS/weight
NaCl-1	Unknown	Data20220124-TCA-Glycolysis-14W.wiff	13200	1520	1.4	62800	10500	1.13	0.210191	12.4	0.0169509
NaCl-2	Unknown	Data20220124-TCA-Glycolysis-14W.wiff	31700	3410	1.38	61200	10600	1.13	0.517974	11.09	0.0467064
NaCl-3	Unknown	Data20220124-TCA-Glycolysis-14W.wiff	12400	2350	1.08	57100	10500	1.13	0.217163	8.72	0.024904
NaCl-4	Unknown	Data20220124-TCA-Glycolysis-14W.wiff	16700	1830	1.39	88200	14500	1.14	0.189342	10.58	0.0178963
NaCl-5	Unknown	Data20220124-TCA-Glycolysis-14W.wiff	13400	1810	1.38	83000	12900	1.13	0.161446	12.4	0.0130198
NaCl-6	Unknown	Data20220124-TCA-Glycolysis-14W.wiff	32200	3280	1.39	77300	14200	1.13	0.416559	11.09	0.0375617
NaCl-7	Unknown	Data20220124-TCA-Glycolysis-14W.wiff	11600	2230	1.06	44900	8630	1.13	0.258352	8.72	0.0296275
NaCl-8	Unknown	Data20220124-TCA-Glycolysis-14W.wiff	14700	1610	1.39	77500	13500	1.14	0.189677	10.58	0.0179279
AOM-1	Unknown	Data20220124-TCA-Glycolysis-14W.wiff	57200	7340	1.29	67000	16400	1.13	0.853731	9.19	0.0928979
AOM-2	Unknown	Data20220124-TCA-Glycolysis-14W.wiff	26200	6050	1.29	162000	21900	1.13	0.161728	18.77	0.00861632
AOM-3	Unknown	Data20220124-TCA-Glycolysis-14W.wiff	105000	15000	1.27	135000	20800	1.13	0.777778	10.89	0.0714213
AOM-4	Unknown	Data20220124-TCA-Glycolysis-14W.wiff	3520	1190	1.28	148000	23300	1.13	0.0237838	6.57	0.00362006
AOM-5	Unknown	Data20220124-TCA-Glycolysis-14W.wiff	52600	5820	1.28	153000	21500	1.13	0.343791	9.19	0.0374092
AOM-6	Unknown	Data20220124-TCA-Glycolysis-14W.wiff	65500	5600	1.39	179000	26100	1.14	0.365922	18.77	0.019495
AOM-7	Unknown	Data20220124-TCA-Glycolysis-14W.wiff	95300	10500	1.33	120000	18800	1.14	0.794167	10.89	0.0729262
AOM-8	Unknown	Data20220124-TCA-Glycolysis-14W.wiff	12600	2080	1.38	160000	26800	1.14	0.07875	6.57	0.0119863
AOM/4PBA-1	Unknown	Data20220124-TCA-Glycolysis-14W.wiff	107000	11700	1.38	119000	18200	1.15	0.89916	11.5	0.0781878
AOM/4PBA-2	Unknown	Data20220124-TCA-Glycolysis-14W.wiff	271000	33500	1.38	147000	20700	1.15	1.84354	20.4	0.0903695
AOM/4PBA-3	Unknown	Data20220124-TCA-Glycolysis-14W.wiff	74100	7940	1.38	124000	18100	1.13	0.597581	9.4	0.0635724
AOM/4PBA-4	Unknown	Data20220124-TCA-Glycolysis-14W.wiff	136000	12000	1.38	124000	18600	1.15	1.09677	11.5	0.0953717
AOM/4PBA-5	Unknown	Data20220124-TCA-Glycolysis-14W.wiff	259000	34100	1.38	140000	20000	1.15	1.85	20.4	0.0906863
AOM/4PBA-6	Unknown	Data20220124-TCA-Glycolysis-14W.wiff	65700	7750	1.38	139000	22500	1.14	0.472662	9.4	0.0502832
AOM/4PBA-7	Unknown	Data20220124-TCA-Glycolysis-14W.wiff	119000	13900	1.38	126000	19700	1.15	0.944444	11.5	0.0821256
AOM/4PBA-8	Unknown	Data20220124-TCA-Glycolysis-14W.wiff	303000	35900	1.38	138000	20400	1.15	2.19565	20.4	0.10763

## Sheet: pyruvate acid
Sample Name	Sample Type	File Name	Analyte Peak Area (counts)	Analyte Peak Height (cps)	Analyte Retention Time (min)	IS Peak Area (counts)	IS Peak Height (cps)	IS Retention Time (min)	Analyte/IS	weight	Analyte/IS/weight
NaCl-1	Unknown	Data20220124-TCA-Glycolysis-14W.wiff	1230	605	1.05	62800	10500	1.13	0.019586	12.4	0.00157952
NaCl-2	Unknown	Data20220124-TCA-Glycolysis-14W.wiff	3810	1050	1.05	61200	10600	1.13	0.0622549	11.09	0.00561361
NaCl-3	Unknown	Data20220124-TCA-Glycolysis-14W.wiff	1900	1020	1.05	57100	10500	1.13	0.033275	8.72	0.00381594
NaCl-4	Unknown	Data20220124-TCA-Glycolysis-14W.wiff	1470	901	1.06	88200	14500	1.14	0.0166667	10.58	0.0015753
NaCl-5	Unknown	Data20220124-TCA-Glycolysis-14W.wiff	95.7	106	0.958	83000	12900	1.13	0.00115301	12.4	9.29848e-05
NaCl-6	Unknown	Data20220124-TCA-Glycolysis-14W.wiff	794	731	1.05	77300	14200	1.13	0.0102717	11.09	0.00092621
NaCl-7	Unknown	Data20220124-TCA-Glycolysis-14W.wiff	1670	728	1.05	44900	8630	1.13	0.0371938	8.72	0.00426534
NaCl-8	Unknown	Data20220124-TCA-Glycolysis-14W.wiff	1340	499	1.06	77500	13500	1.14	0.0172903	10.58	0.00163425
AOM-1	Unknown	Data20220124-TCA-Glycolysis-14W.wiff	4240	1120	1.06	67000	16400	1.13	0.0632836	9.19	0.00688614
AOM-2	Unknown	Data20220124-TCA-Glycolysis-14W.wiff	1380	659	1.05	67000	21900	1.13	0.020597	18.77	0.00109734
AOM-3	Unknown	Data20220124-TCA-Glycolysis-14W.wiff	1840	1380	1.05	135000	20800	1.13	0.0136296	10.89	0.00125157
AOM-4	Unknown	Data20220124-TCA-Glycolysis-14W.wiff	1030	834	1.06	148000	23300	1.13	0.00695946	6.57	0.00105928
AOM-5	Unknown	Data20220124-TCA-Glycolysis-14W.wiff	4690	1360	1.06	153000	21500	1.13	0.0306536	9.19	0.00333554
AOM-6	Unknown	Data20220124-TCA-Glycolysis-14W.wiff	7008	548	1.06	179000	26100	1.14	0.0391508	18.77	0.00208582
AOM-7	Unknown	Data20220124-TCA-Glycolysis-14W.wiff	2700	1220	1.07	120000	18800	1.14	0.0225	10.89	0.00206612
AOM-8	Unknown	Data20220124-TCA-Glycolysis-14W.wiff	1850	1070	1.06	160000	26800	1.14	0.0115625	6.57	0.00175989
AOM/4PBA-1	Unknown	Data20220124-TCA-Glycolysis-14W.wiff	907	406	1.08	119000	18200	1.15	0.00762185	11.5	0.000662769
AOM/4PBA-2	Unknown	Data20220124-TCA-Glycolysis-14W.wiff	1360	409	1.08	147000	20700	1.15	0.0092517	20.4	0.000453515
AOM/4PBA-3	Unknown	Data20220124-TCA-Glycolysis-14W.wiff	842	393	1.07	124000	18100	1.13	0.00679032	9.4	0.000722375
AOM/4PBA-4	Unknown	Data20220124-TCA-Glycolysis-14W.wiff	84	81.9	1.02	124000	18600	1.15	0.000677419	11.5	5.8906e-05
AOM/4PBA-5	Unknown	Data20220124-TCA-Glycolysis-14W.wiff	2100	601	1.11	140000	20000	1.15	0.015	20.4	0.000735294
AOM/4PBA-6	Unknown	Data20220124-TCA-Glycolysis-14W.wiff	2160	779	1.08	139000	22500	1.14	0.0155396	9.4	0.00165315
AOM/4PBA-7	Unknown	Data20220124-TCA-Glycolysis-14W.wiff	411	167	0.855	126000	19700	1.15	0.0032619	11.5	0.000283644
AOM/4PBA-8	Unknown	Data20220124-TCA-Glycolysis-14W.wiff	3040	620	1.08	138000	20400	1.15	0.022029	20.4	0.00107985

## Sheet: Lactic acid
Sample Name	Sample Type	File Name	Analyte Peak Area (counts)	Analyte Peak Height (cps)	Analyte Retention Time (min)	IS Peak Area (counts)	IS Peak Height (cps)	IS Retention Time (min)	Analyte/IS	weight	Analyte/IS/weight
NaCl-1	Unknown	Data20220124-TCA-Glycolysis-14W.wiff	1180000	395000	1.49	62800	10500	1.13	18.7898	12.4	1.51531
NaCl-2	Unknown	Data20220124-TCA-Glycolysis-14W.wiff	1420000	495000	1.49	61200	10600	1.13	23.2026	11.09	2.09221
NaCl-3	Unknown	Data20220124-TCA-Glycolysis-14W.wiff	216000	77800	1.5	57100	10500	1.13	3.78284	8.72	0.433812
NaCl-4	Unknown	Data20220124-TCA-Glycolysis-14W.wiff	2950000	1020000	1.51	88200	14500	1.14	33.4467	10.58	3.16131
NaCl-5	Unknown	Data20220124-TCA-Glycolysis-14W.wiff	1240000	441000	1.5	83000	12900	1.13	14.9398	12.4	1.20482
NaCl-6	Unknown	Data20220124-TCA-Glycolysis-14W.wiff	1500000	504000	1.5	77300	14200	1.13	19.4049	11.09	1.74977
NaCl-7	Unknown	Data20220124-TCA-Glycolysis-14W.wiff	204000	74100	1.49	44900	8630	1.13	4.54343	8.72	0.521036
NaCl-8	Unknown	Data20220124-TCA-Glycolysis-14W.wiff	2610000	922000	1.51	77500	13500	1.14	33.6774	10.58	3.18312
AOM-1	Unknown	Data20220124-TCA-Glycolysis-14W.wiff	5480000	1660000	1.49	67000	16400	1.13	81.791	9.19	8.9
AOM-2	Unknown	Data20220124-TCA-Glycolysis-14W.wiff	5710000	1840000	1.49	162000	21900	1.13	35.2469	18.77	1.87783
AOM-3	Unknown	Data20220124-TCA-Glycolysis-14W.wiff	2720000	917000	1.5	135000	20800	1.13	20.1481	10.89	1.85015
AOM-4	Unknown	Data20220124-TCA-Glycolysis-14W.wiff	5530000	1790000	1.51	148000	23300	1.13	37.3649	6.57	5.68719
AOM-5	Unknown	Data20220124-TCA-Glycolysis-14W.wiff	5540000	1800000	1.49	153000	21500	1.13	36.2092	9.19	3.94006
AOM-6	Unknown	Data20220124-TCA-Glycolysis-14W.wiff	6110000	2010000	1.5	179000	26100	1.14	34.1341	18.77	1.81854
AOM-7	Unknown	Data20220124-TCA-Glycolysis-14W.wiff	2270000	807000	1.49	120000	18800	1.14	18.9167	10.89	1.73707
AOM-8	Unknown	Data20220124-TCA-Glycolysis-14W.wiff	5640000	1850000	1.5	160000	26800	1.14	35.25	6.57	5.3653
AOM/4PBA-1	Unknown	Data20220124-TCA-Glycolysis-14W.wiff	1360000	440000	1.49	119000	18200	1.15	11.4286	11.5	0.993789
AOM/4PBA-2	Unknown	Data20220124-TCA-Glycolysis-14W.wiff	5680000	1740000	1.5	147000	20700	1.15	38.6395	20.4	1.89409
AOM/4PBA-3	Unknown	Data20220124-TCA-Glycolysis-14W.wiff	1670000	570000	1.49	124000	18100	1.13	13.4677	9.4	1.43274
AOM/4PBA-4	Unknown	Data20220124-TCA-Glycolysis-14W.wiff	1410000	488000	1.5	124000	18600	1.15	11.371	11.5	0.98878
AOM/4PBA-5	Unknown	Data20220124-TCA-Glycolysis-14W.wiff	5740000	1820000	1.49	140000	20000	1.15	41	20.4	2.0098
AOM/4PBA-6	Unknown	Data20220124-TCA-Glycolysis-14W.wiff	1720000	606000	1.5	139000	22500	1.14	12.3741	9.4	1.31639
AOM/4PBA-7	Unknown	Data20220124-TCA-Glycolysis-14W.wiff	1410000	491000	1.5	126000	19700	1.15	11.1905	11.5	0.973085
AOM/4PBA-8	Unknown	Data20220124-TCA-Glycolysis-14W.wiff	5590000	1790000	1.49	138000	20400	1.15	40.5072	20.4	1.98565

## Sheet: Aconitric acid
Sample Name	Sample Type	File Name	Analyte Peak Area (counts)	Analyte Peak Height (cps)	Analyte Retention Time (min)	IS Peak Area (counts)	IS Peak Height (cps)	IS Retention Time (min)	Analyte/IS	weight	Analyte/IS/weight
NaCl-1	Unknown	Data20220124-colon tissue-7W.wiff	145000	85200	1.48	172000	24200	1.13	0.843023	12.4	0.0679857
NaCl-2	Unknown	Data20220124-colon tissue-7W.wiff	96600	44700	1.48	172000	21900	1.13	0.561628	11.09	0.0506427
NaCl-3	Unknown	Data20220124-colon tissue-7W.wiff	24300	8890	1.49	165000	23500	1.13	0.147273	8.72	0.0168891
NaCl-4	Unknown	Data20220124-colon tissue-7W.wiff	89600	46700	1.49	146000	21400	1.13	0.613699	10.58	0.0580055
NaCl-5	Unknown	Data20220124-colon tissue-7W.wiff	163000	73800	1.48	161000	22300	1.13	1.01242	12.4	0.081647
NaCl-6	Unknown	Data20220124-colon tissue-7W.wiff	91800	38200	1.49	161000	21600	1.14	0.570186	11.09	0.0514145
NaCl-7	Unknown	Data20220124-colon tissue-7W.wiff	21500	10500	1.48	152000	21300	1.13	0.141447	8.72	0.016221
NaCl-8	Unknown	Data20220124-colon tissue-7W.wiff	111000	46400	1.49	137000	19000	1.13	0.810219	10.58	0.0765802
AOM-1	Unknown	Data20220124-colon tissue-7W.wiff	7610	2640	1.49	148000	20700	1.13	0.0514189	9.19	0.00559509
AOM-2	Unknown	Data20220124-colon tissue-7W.wiff	58100	25300	1.49	150000	19700	1.13	0.387333	18.77	0.0206358
AOM-3	Unknown	Data20220124-colon tissue-7W.wiff	22600	9310	1.48	148000	20900	1.13	0.152703	10.89	0.0140223
AOM-4	Unknown	Data20220124-colon tissue-7W.wiff	17600	8140	1.48	158000	22300	1.13	0.111392	6.57	0.0169547
AOM-5	Unknown	Data20220124-colon tissue-7W.wiff	8260	2930	1.48	148000	18700	1.13	0.0558108	9.19	0.00607299
AOM-6	Unknown	Data20220124-colon tissue-7W.wiff	56300	26600	1.49	150000	19100	1.13	0.375333	18.77	0.0199964
AOM-7	Unknown	Data20220124-colon tissue-7W.wiff	21200	11100	1.49	123000	16300	1.13	0.172358	10.89	0.0158272
AOM-8	Unknown	Data20220124-colon tissue-7W.wiff	15700	7690	1.48	149000	19300	1.12	0.105369	6.57	0.0160379
AOM/4PBA-1	Unknown	Data20220124-colon tissue-7W.wiff	24700	11400	1.49	145000	19800	1.14	0.170345	11.5	0.0148126
AOM/4PBA-2	Unknown	Data20220124-colon tissue-7W.wiff	24200	12800	1.48	148000	19000	1.13	0.163514	20.4	0.00801537
AOM/4PBA-3	Unknown	Data20220124-colon tissue-7W.wiff	12500	6250	1.48	133000	19500	1.14	0.093985	9.4	0.0099984
AOM/4PBA-4	Unknown	Data20220124-colon tissue-7W.wiff	22700	10800	1.48	133000	18400	1.14	0.170677	11.5	0.0148415
AOM/4PBA-5	Unknown	Data20220124-colon tissue-7W.wiff	27700	13700	1.48	143000	18500	1.13	0.193706	20.4	0.00949541
AOM/4PBA-6	Unknown	Data20220124-colon tissue-7W.wiff	16400	6810	1.49	139000	19200	1.15	0.117986	9.4	0.0125517
AOM/4PBA-7	Unknown	Data20220124-colon tissue-7W.wiff	24700	11000	1.49	132000	19500	1.14	0.187121	11.5	0.0162714
AOM/4PBA-8	Unknown	Data20220124-colon tissue-7W.wiff	21500	11200	1.48	146000	18800	1.13	0.14726	20.4	0.00721864

## Sheet: Isocitric acid
Sample Name	Sample Type	File Name	Analyte Peak Area (counts)	Analyte Peak Height (cps)	Analyte Retention Time (min)	IS Peak Area (counts)	IS Peak Height (cps)	IS Retention Time (min)	Analyte/IS	weight	Analyte/IS/weight
NaCl-1	Unknown	Data20220124-colon tissue-7W.wiff	6990000	3210000	1.48	172000	24200	1.13	40.6395	12.4	3.27738
NaCl-2	Unknown	Data20220124-colon tissue-7W.wiff	5200000	2360000	1.49	172000	21900	1.13	30.2326	11.09	2.72611
NaCl-3	Unknown	Data20220124-colon tissue-7W.wiff	1040000	436000	1.49	165000	23500	1.13	6.30303	8.72	0.722825
NaCl-4	Unknown	Data20220124-colon tissue-7W.wiff	5480000	2420000	1.49	146000	21400	1.13	37.5342	10.58	3.54766
NaCl-5	Unknown	Data20220124-colon tissue-7W.wiff	6240000	2750000	1.49	161000	22300	1.13	38.7578	12.4	3.12563
NaCl-6	Unknown	Data20220124-colon tissue-7W.wiff	4210000	1940000	1.49	161000	21600	1.14	26.1491	11.09	2.3579
NaCl-7	Unknown	Data20220124-colon tissue-7W.wiff	944000	405000	1.48	152000	21300	1.13	6.21053	8.72	0.712216
NaCl-8	Unknown	Data20220124-colon tissue-7W.wiff	5550000	2530000	1.49	137000	19000	1.13	40.5109	10.58	3.82901
AOM-1	Unknown	Data20220124-colon tissue-7W.wiff	149000	61100	1.49	148000	20700	1.13	1.00676	9.19	0.109549
AOM-2	Unknown	Data20220124-colon tissue-7W.wiff	2420000	1020000	1.49	150000	19700	1.13	16.1333	18.77	0.859528
AOM-3	Unknown	Data20220124-colon tissue-7W.wiff	993000	402000	1.48	148000	20900	1.13	6.70946	10.89	0.616112
AOM-4	Unknown	Data20220124-colon tissue-7W.wiff	761000	296000	1.49	158000	22300	1.13	4.81646	6.57	0.733098
AOM-5	Unknown	Data20220124-colon tissue-7W.wiff	144000	60400	1.48	148000	18700	1.13	0.972973	9.19	0.105873
AOM-6	Unknown	Data20220124-colon tissue-7W.wiff	2360000	1160000	1.49	150000	19100	1.13	15.7333	18.77	0.838217
AOM-7	Unknown	Data20220124-colon tissue-7W.wiff	945000	360000	1.5	123000	16300	1.13	7.68293	10.89	0.705503
AOM-8	Unknown	Data20220124-colon tissue-7W.wiff	736000	289000	1.48	149000	19300	1.12	4.9396	6.57	0.751841
AOM/4PBA-1	Unknown	Data20220124-colon tissue-7W.wiff	1330000	643000	1.49	145000	19800	1.14	9.17241	11.5	0.797601
AOM/4PBA-2	Unknown	Data20220124-colon tissue-7W.wiff	1420000	654000	1.49	148000	19000	1.13	9.59459	20.4	0.470323
AOM/4PBA-3	Unknown	Data20220124-colon tissue-7W.wiff	564000	320000	1.49	133000	19500	1.14	4.2406	9.4	0.451128
AOM/4PBA-4	Unknown	Data20220124-colon tissue-7W.wiff	1300000	652000	1.49	133000	18400	1.14	9.77444	11.5	0.849951
AOM/4PBA-5	Unknown	Data20220124-colon tissue-7W.wiff	1610000	763000	1.49	143000	18500	1.13	11.2587	20.4	0.551899
AOM/4PBA-6	Unknown	Data20220124-colon tissue-7W.wiff	617000	323000	1.5	139000	19200	1.15	4.43885	9.4	0.472218
AOM/4PBA-7	Unknown	Data20220124-colon tissue-7W.wiff	1550000	757000	1.49	132000	19500	1.14	11.7424	11.5	1.02108
AOM/4PBA-8	Unknown	Data20220124-colon tissue-7W.wiff	1430000	727000	1.48	146000	18800	1.13	9.79452	20.4	0.480124
											#DIV/0!

## Sheet: α-Ketoglutarate
Sample Name	Sample Type	File Name	Analyte Peak Area (counts)	Analyte Peak Height (cps)	Analyte Retention Time (min)	IS Peak Area (counts)	IS Peak Height (cps)	IS Retention Time (min)	Analyte/IS	weight	Analyte/IS/weight
NaCl-1	Unknown	Data20220124-colon tissue-7W.wiff	125000	27700	1.39	172000	24200	1.13	0.726744	12.4	0.0586084
NaCl-2	Unknown	Data20220124-colon tissue-7W.wiff	256000	53800	1.4	172000	21900	1.13	1.48837	11.09	0.134208
NaCl-3	Unknown	Data20220124-colon tissue-7W.wiff	107000	21300	1.39	165000	23500	1.13	0.648485	8.72	0.0743675
NaCl-4	Unknown	Data20220124-colon tissue-7W.wiff	124000	26600	1.4	146000	21400	1.13	0.849315	10.58	0.0802755
NaCl-5	Unknown	Data20220124-colon tissue-7W.wiff	125000	28800	1.37	161000	22300	1.13	0.776398	12.4	0.0626127
NaCl-6	Unknown	Data20220124-colon tissue-7W.wiff	209000	41600	1.4	161000	21600	1.14	1.29814	11.09	0.117055
NaCl-7	Unknown	Data20220124-colon tissue-7W.wiff	107000	27100	1.37	152000	21300	1.13	0.703947	8.72	0.0807279
NaCl-8	Unknown	Data20220124-colon tissue-7W.wiff	134000	27000	1.39	137000	19000	1.13	0.978102	10.58	0.0924482
AOM-1	Unknown	Data20220124-colon tissue-7W.wiff	30700	9990	1.37	148000	20700	1.13	0.207432	9.19	0.0225715
AOM-2	Unknown	Data20220124-colon tissue-7W.wiff	53900	8560	1.39	150000	19700	1.13	0.359333	18.77	0.019144
AOM-3	Unknown	Data20220124-colon tissue-7W.wiff	84400	15700	1.39	148000	20900	1.13	0.57027	10.89	0.0523664
AOM-4	Unknown	Data20220124-colon tissue-7W.wiff	21700	7900	1.38	158000	22300	1.13	0.137342	6.57	0.0209044
AOM-5	Unknown	Data20220124-colon tissue-7W.wiff	32000	11500	1.38	148000	18700	1.13	0.216216	9.19	0.0235273
AOM-6	Unknown	Data20220124-colon tissue-7W.wiff	46600	8760	1.39	150000	19100	1.13	0.310667	18.77	0.0165512
AOM-7	Unknown	Data20220124-colon tissue-7W.wiff	48800	8960	1.41	123000	16300	1.13	0.396748	10.89	0.0364323
AOM-8	Unknown	Data20220124-colon tissue-7W.wiff	24400	10800	1.37	149000	19300	1.12	0.163758	6.57	0.0249252
AOM/4PBA-1	Unknown	Data20220124-colon tissue-7W.wiff	38100	7110	1.42	145000	19800	1.14	0.262759	11.5	0.0228486
AOM/4PBA-2	Unknown	Data20220124-colon tissue-7W.wiff	60600	11900	1.4	148000	19000	1.13	0.409459	20.4	0.0200715
AOM/4PBA-3	Unknown	Data20220124-colon tissue-7W.wiff	13500	2160	1.45	133000	19500	1.14	0.101504	9.4	0.0107983
AOM/4PBA-4	Unknown	Data20220124-colon tissue-7W.wiff	38100	7610	1.4	133000	18400	1.14	0.286466	11.5	0.0249101
AOM/4PBA-5	Unknown	Data20220124-colon tissue-7W.wiff	68800	14500	1.39	143000	18500	1.13	0.481119	20.4	0.0235843
AOM/4PBA-6	Unknown	Data20220124-colon tissue-7W.wiff	2510	1750	1.38	139000	19200	1.15	0.0180576	9.4	0.00192102
AOM/4PBA-7	Unknown	Data20220124-colon tissue-7W.wiff	39300	7170	1.42	132000	19500	1.14	0.297727	11.5	0.0258893
AOM/4PBA-8	Unknown	Data20220124-colon tissue-7W.wiff	76200	20600	1.37	146000	18800	1.13	0.521918	20.4	0.0255842

[truncated: 4 more sheets: Succinic acid, Fumaric acid, Malic acid, Oxaloaceti acid]
